# Supplementary material for: Age trends of genetic parameters and genotype-by-environment interactions for growth traits of Eucalyptus urophylla clones in South-China
Source: PeerJ. 2024 Oct 15;12:e18218. doi: 10.7717/peerj.18218 (PMC11488493; doi:10.7717/peerj.18218)
Supplement: Supplemental Information 1 [file peerj-12-18218-s001.xlsx]

## Sheet: Sheet1
Location	Clone	Replicate	The survival rate(%) of each age (year)
			0.5	1	1.5	2.5	3.5	4.7	5.7	7.9
Shankou	20	10	80	80	80	80	80	80	80	80
Shankou	20	9	100	100	100	100	100	100	100	100
Shankou	20	8	80	80	80	80	80	80	80	80
Shankou	20	7	100	100	100	100	100	100	40	NA
Shankou	20	6	100	100	100	100	100	100	80	80
Shankou	20	5	100	100	100	100	100	100	80	80
Shankou	20	4	100	100	100	100	100	100	80	80
Shankou	20	3	100	100	100	100	100	100	80	80
Shankou	20	2	100	100	100	100	100	100	100	80
Shankou	20	1	100	100	100	80	80	80	80	80
Shankou	19	10	100	100	100	100	100	80	80	80
Shankou	19	9	100	100	100	80	100	100	80	80
Shankou	19	8	100	100	100	100	100	80	80	60
Shankou	19	7	100	100	100	100	100	100	20	20
Shankou	19	6	100	100	100	100	100	100	80	80
Shankou	19	5	100	100	100	100	100	100	100	100
Shankou	19	4	100	100	100	100	100	100	100	100
Shankou	19	3	100	100	100	100	100	100	100	100
Shankou	19	2	100	100	100	100	100	100	80	60
Shankou	19	1	80	80	80	80	80	80	80	80
Shankou	18	10	100	100	100	100	100	100	100	100
Shankou	18	9	100	100	100	100	100	80	80	80
Shankou	18	8	100	100	100	100	100	60	60	60
Shankou	18	7	80	80	80	80	80	60	60	60
Shankou	18	6	100	100	100	100	100	100	100	100
Shankou	18	5	100	100	100	100	100	100	80	40
Shankou	18	4	100	100	100	100	100	100	100	100
Shankou	18	3	100	100	100	100	100	100	80	80
Shankou	18	2	100	100	100	100	100	100	100	100
Shankou	18	1	100	100	100	100	100	100	100	100
Shankou	17	10	100	100	100	100	100	100	100	100
Shankou	17	9	80	80	80	80	80	80	60	60
Shankou	17	8	60	60	60	60	60	60	60	60
Shankou	17	7	60	60	60	60	60	60	60	60
Shankou	17	6	100	100	100	100	100	100	60	60
Shankou	17	5	100	100	100	100	100	100	100	100
Shankou	17	4	100	100	100	100	100	100	100	100
Shankou	17	3	100	100	100	100	100	100	80	80
Shankou	17	2	100	100	100	100	100	100	100	100
Shankou	17	1	100	100	100	80	80	80	80	80
Shankou	16	10	100	100	100	100	100	100	100	100
Shankou	16	9	100	100	100	100	100	80	80	80
Shankou	16	8	60	60	60	60	60	60	60	60
Shankou	16	7	80	80	80	80	80	60	60	60
Shankou	16	6	100	100	100	100	100	100	100	80
Shankou	16	5	100	100	100	100	100	100	100	60
Shankou	16	4	100	100	100	100	100	100	100	100
Shankou	16	3	100	100	100	100	100	100	100	100
Shankou	16	2	100	100	100	100	100	80	100	100
Shankou	16	1	100	100	100	80	80	80	40	40
Shankou	15	10	100	100	100	80	80	80	60	60
Shankou	15	9	100	100	100	100	100	100	100	100
Shankou	15	8	100	100	80	80	80	80	80	80
Shankou	15	7	80	80	80	60	60	60	60	60
Shankou	15	6	100	100	100	100	100	100	100	100
Shankou	15	5	100	100	100	100	80	80	80	80
Shankou	15	4	100	100	100	100	100	100	100	100
Shankou	15	3	100	100	100	100	100	100	100	100
Shankou	15	2	100	100	100	80	80	60	60	60
Shankou	15	1	100	100	100	80	80	80	80	80
Shankou	14	10	100	100	100	100	100	100	80	80
Shankou	14	9	100	100	100	100	100	100	100	100
Shankou	14	8	80	80	80	80	80	80	80	80
Shankou	14	7	100	100	100	100	100	100	100	100
Shankou	14	6	100	100	100	80	80	80	80	60
Shankou	14	5	100	100	100	100	100	100	80	80
Shankou	14	4	100	100	100	100	100	100	100	60
Shankou	14	3	100	100	100	100	100	100	100	60
Shankou	14	2	100	100	100	100	100	100	60	60
Shankou	14	1	100	100	100	100	100	100	100	40
Shankou	13	10	100	100	100	100	100	100	100	100
Shankou	13	9	100	100	100	100	100	100	100	100
Shankou	13	8	100	100	100	100	100	100	80	80
Shankou	13	7	100	100	100	100	100	100	100	100
Shankou	13	6	80	80	80	80	80	80	80	80
Shankou	13	5	100	100	100	100	100	100	100	80
Shankou	13	4	100	100	100	100	100	100	80	80
Shankou	13	3	100	100	100	100	100	100	100	100
Shankou	13	2	100	100	100	100	100	100	60	60
Shankou	13	1	100	100	100	100	100	100	100	100
Shankou	12	10	100	100	100	100	100	100	100	100
Shankou	12	9	100	100	100	100	100	100	100	100
Shankou	12	8	100	100	100	100	100	100	100	100
Shankou	12	7	100	80	100	100	100	100	80	80
Shankou	12	6	100	100	100	100	100	80	80	80
Shankou	12	5	100	100	100	100	100	80	100	100
Shankou	12	4	100	100	100	100	100	100	100	100
Shankou	12	3	100	100	100	100	100	100	100	100
Shankou	12	2	100	100	100	100	100	100	80	80
Shankou	12	1	100	100	100	100	100	100	100	100
Shankou	11	10	100	100	100	100	100	100	80	80
Shankou	11	9	100	100	100	100	100	100	100	100
Shankou	11	8	100	100	100	100	100	100	100	100
Shankou	11	7	100	100	100	100	100	100	100	100
Shankou	11	6	80	80	80	80	80	80	80	80
Shankou	11	5	100	80	80	80	80	80	80	60
Shankou	11	4	100	100	100	100	100	100	80	80
Shankou	11	3	100	100	100	100	100	100	100	80
Shankou	11	2	100	100	100	100	100	100	NA	NA
Shankou	11	1	100	100	100	100	100	100	40	40
Shankou	10	10	100	100	100	100	100	100	100	100
Shankou	10	9	100	100	100	100	100	100	100	100
Shankou	10	8	100	100	100	100	100	100	100	100
Shankou	10	7	100	100	100	100	100	100	100	100
Shankou	10	6	100	100	100	100	100	100	100	100
Shankou	10	5	100	100	100	100	100	80	80	80
Shankou	10	4	100	100	100	100	100	100	100	100
Shankou	10	3	100	100	100	100	100	100	100	100
Shankou	10	2	100	100	100	100	100	100	100	100
Shankou	10	1	100	100	100	100	80	80	80	80
Shankou	9	10	100	100	100	100	80	80	80	80
Shankou	9	9	100	100	100	100	100	100	80	80
Shankou	9	8	100	100	100	100	100	100	80	80
Shankou	9	7	80	80	80	80	80	80	80	80
Shankou	9	6	100	100	100	100	100	80	80	80
Shankou	9	5	80	80	80	80	80	80	80	80
Shankou	9	4	100	100	100	100	100	100	100	100
Shankou	9	3	100	100	100	100	100	80	40	40
Shankou	9	2	100	100	100	100	100	100	80	80
Shankou	9	1	100	100	80	80	80	80	80	80
Shankou	8	10	100	100	100	100	100	100	40	40
Shankou	8	9	100	100	100	100	100	100	40	40
Shankou	8	8	100	80	80	80	80	60	60	20
Shankou	8	7	100	100	100	100	100	80	80	20
Shankou	8	6	100	100	100	100	100	100	60	60
Shankou	8	5	100	100	80	100	100	100	80	NA
Shankou	8	4	100	100	100	100	100	100	60	NA
Shankou	8	3	100	100	100	100	100	80	60	60
Shankou	8	2	100	100	100	100	100	80	80	NA
Shankou	8	1	100	100	100	100	100	40	NA	NA
Shankou	7	10	100	100	100	100	100	80	80	60
Shankou	7	9	100	100	100	100	100	100	100	100
Shankou	7	8	100	100	100	100	100	100	100	100
Shankou	7	7	100	80	100	80	80	80	80	80
Shankou	7	6	100	100	100	100	100	80	80	80
Shankou	7	5	100	100	100	100	100	100	100	100
Shankou	7	4	100	100	100	100	100	80	80	80
Shankou	7	3	100	100	100	100	100	100	100	100
Shankou	7	2	100	100	100	100	100	100	100	100
Shankou	7	1	100	100	100	100	100	100	100	100
Shankou	6	10	100	100	80	80	60	60	60	20
Shankou	6	9	100	100	100	100	40	20	20	20
Shankou	6	8	100	100	100	100	20	NA	NA	NA
Shankou	6	7	100	100	100	100	40	20	NA	NA
Shankou	6	6	100	100	100	100	80	NA	NA	NA
Shankou	6	5	100	100	100	100	80	80	NA	NA
Shankou	6	4	80	80	80	80	80	80	40	40
Shankou	6	3	100	100	100	100	100	80	20	20
Shankou	6	2	100	100	100	100	20	NA	NA	NA
Shankou	6	1	100	100	100	100	20	20	NA	NA
Shankou	5	10	80	80	80	60	60	60	NA	NA
Shankou	5	9	100	100	100	100	100	100	60	60
Shankou	5	8	100	100	40	40	40	40	NA	NA
Shankou	5	7	80	80	80	80	80	80	40	40
Shankou	5	6	100	100	100	100	100	100	20	20
Shankou	5	5	100	100	100	100	100	100	40	40
Shankou	5	4	80	80	80	60	60	60	NA	NA
Shankou	5	3	100	100	100	100	100	100	40	NA
Shankou	5	2	100	100	80	80	80	60	40	40
Shankou	5	1	100	100	100	100	100	100	NA	NA
Shankou	4	10	100	100	100	100	80	60	60	60
Shankou	4	9	80	80	80	80	60	40	40	40
Shankou	4	8	80	80	80	80	80	80	20	20
Shankou	4	7	100	100	100	100	100	100	40	40
Shankou	4	6	100	100	100	100	100	80	20	20
Shankou	4	5	100	100	100	100	100	100	60	60
Shankou	4	4	100	100	100	100	100	40	20	20
Shankou	4	3	100	100	100	100	100	NA	NA	NA
Shankou	4	2	100	100	100	100	100	100	20	20
Shankou	4	1	100	100	100	100	60	40	40	40
Shankou	3	10	100	100	80	40	40	40	40	40
Shankou	3	9	100	80	60	60	60	60	20	20
Shankou	3	8	100	100	100	100	80	80	NA	NA
Shankou	3	7	100	100	60	60	40	40	NA	NA
Shankou	3	6	100	100	100	100	80	80	NA	NA
Shankou	3	5	100	100	40	40	NA	NA	NA	NA
Shankou	3	4	80	80	60	60	60	60	NA	NA
Shankou	3	3	20	20	20	20	20	20	NA	NA
Shankou	3	2	100	80	80	80	80	80	NA	NA
Shankou	3	1	100	80	60	60	20	NA	NA	NA
Shankou	2	10	100	100	100	100	100	100	80	40
Shankou	2	9	100	100	100	100	100	80	80	60
Shankou	2	8	100	100	100	100	100	60	40	20
Shankou	2	7	100	100	100	100	60	60	NA	NA
Shankou	2	6	100	100	100	100	80	80	NA	NA
Shankou	2	5	100	100	100	100	100	60	NA	NA
Shankou	2	4	100	100	100	100	100	80	NA	NA
Shankou	2	3	100	100	100	100	100	80	20	NA
Shankou	2	2	100	100	100	100	100	40	NA	NA
Shankou	2	1	100	100	100	100	100	60	NA	NA
Shankou	1	10	100	100	100	100	100	100	80	80
Shankou	1	9	80	80	80	80	80	80	40	40
Shankou	1	8	80	80	80	80	80	80	60	60
Shankou	1	7	100	100	100	100	100	40	20	20
Shankou	1	6	100	100	100	100	100	100	20	20
Shankou	1	5	100	100	100	100	80	40	NA	NA
Shankou	1	4	100	100	100	100	100	100	20	NA
Shankou	1	3	100	100	100	100	100	100	20	20
Shankou	1	2	100	100	100	100	100	100	40	40
Shankou	1	1	100	100	100	100	100	60	20	20
Tiantang	20	10	100	100	100	100	100	100	80	80
Tiantang	20	9	100	100	100	100	100	100	100	100
Tiantang	20	8	100	100	100	100	100	100	100	100
Tiantang	20	7	100	100	100	100	100	100	100	100
Tiantang	20	6	100	100	100	100	100	100	100	100
Tiantang	20	5	100	100	100	100	100	100	100	100
Tiantang	20	4	100	100	100	100	100	100	100	100
Tiantang	20	3	100	100	100	100	100	100	40	40
Tiantang	20	2	100	100	100	100	100	100	100	40
Tiantang	20	1	100	100	100	100	100	100	100	100
Tiantang	19	10	100	100	100	100	100	100	80	80
Tiantang	19	9	100	100	100	100	100	100	100	100
Tiantang	19	8	100	100	100	100	100	80	80	80
Tiantang	19	7	100	100	100	100	100	100	100	100
Tiantang	19	6	100	100	100	100	100	100	100	100
Tiantang	19	5	100	100	100	100	100	100	80	80
Tiantang	19	4	100	100	100	100	80	80	80	80
Tiantang	19	3	100	100	100	100	100	100	100	100
Tiantang	19	2	100	100	100	100	100	100	100	60
Tiantang	19	1	100	100	100	100	100	100	100	100
Tiantang	18	10	100	100	100	100	100	100	100	100
Tiantang	18	9	100	100	100	100	100	100	80	60
Tiantang	18	8	100	100	100	100	100	100	100	100
Tiantang	18	7	100	100	100	100	100	100	100	100
Tiantang	18	6	100	100	100	100	100	100	100	100
Tiantang	18	5	100	100	100	100	100	100	80	80
Tiantang	18	4	100	100	100	100	100	100	80	80
Tiantang	18	3	100	100	100	100	100	100	100	100
Tiantang	18	2	100	100	100	100	100	100	100	100
Tiantang	18	1	100	100	100	100	100	100	100	100
Tiantang	17	10	100	100	100	100	100	100	100	100
Tiantang	17	9	100	100	100	100	100	100	100	100
Tiantang	17	8	100	100	100	100	100	100	100	100
Tiantang	17	7	100	100	100	100	100	100	100	100
Tiantang	17	6	100	100	100	100	100	100	100	100
Tiantang	17	5	100	100	100	100	100	100	100	100
Tiantang	17	4	100	100	100	100	100	100	100	100
Tiantang	17	3	100	100	100	100	100	100	100	100
Tiantang	17	2	100	100	100	100	100	100	100	100
Tiantang	17	1	100	100	100	100	100	100	100	100
Tiantang	16	10	100	100	100	80	80	80	80	80
Tiantang	16	9	100	100	100	100	100	100	100	100
Tiantang	16	8	100	100	100	100	100	100	80	80
Tiantang	16	7	100	100	100	100	100	100	100	100
Tiantang	16	6	40	40	40	20	20	20	20	20
Tiantang	16	5	80	80	80	80	80	80	80	60
Tiantang	16	4	100	100	100	100	100	100	80	80
Tiantang	16	3	100	100	100	100	100	100	80	80
Tiantang	16	2	100	100	100	100	100	100	100	100
Tiantang	16	1	100	100	80	80	80	80	80	80
Tiantang	15	10	100	100	100	100	100	100	80	80
Tiantang	15	9	100	100	100	100	100	100	100	100
Tiantang	15	8	100	100	100	100	100	80	80	80
Tiantang	15	7	80	80	80	80	80	80	80	80
Tiantang	15	6	100	100	100	100	100	80	80	80
Tiantang	15	5	100	100	100	100	100	100	80	80
Tiantang	15	4	100	100	100	100	100	100	100	100
Tiantang	15	3	100	100	100	100	60	60	60	60
Tiantang	15	2	100	100	100	80	80	60	60	100
Tiantang	15	1	100	100	100	100	100	100	100	100
Tiantang	14	10	100	100	100	100	100	100	100	80
Tiantang	14	9	100	100	60	60	60	60	60	40
Tiantang	14	8	80	80	60	40	40	40	40	40
Tiantang	14	7	100	100	100	100	100	100	80	80
Tiantang	14	6	100	100	100	100	100	100	100	100
Tiantang	14	5	100	100	100	100	100	100	100	100
Tiantang	14	4	100	100	100	100	100	100	100	80
Tiantang	14	3	100	100	100	100	100	100	100	100
Tiantang	14	2	80	80	80	80	80	80	80	80
Tiantang	14	1	100	100	100	100	100	100	100	80
Tiantang	13	10	100	100	100	100	100	80	80	80
Tiantang	13	9	100	80	80	60	60	60	60	60
Tiantang	13	8	100	100	100	100	100	100	100	100
Tiantang	13	7	100	100	100	100	100	100	100	100
Tiantang	13	6	100	100	100	100	100	100	100	100
Tiantang	13	5	100	100	100	100	100	100	100	100
Tiantang	13	4	100	100	80	100	80	80	60	60
Tiantang	13	3	100	100	100	100	100	100	100	100
Tiantang	13	2	100	100	100	100	100	100	100	80
Tiantang	13	1	100	100	100	100	100	80	60	60
Tiantang	12	10	100	100	100	100	100	100	80	80
Tiantang	12	9	100	100	100	100	100	80	80	80
Tiantang	12	8	100	100	100	100	100	100	100	100
Tiantang	12	7	100	100	80	100	100	100	100	100
Tiantang	12	6	100	100	100	100	100	100	100	100
Tiantang	12	5	100	100	100	100	100	100	100	100
Tiantang	12	4	100	100	100	100	100	100	100	100
Tiantang	12	3	100	100	100	100	100	100	100	100
Tiantang	12	2	100	100	100	100	100	100	100	80
Tiantang	12	1	100	100	100	100	100	100	100	100
Tiantang	11	10	100	100	100	100	100	100	40	40
Tiantang	11	9	100	100	100	100	100	100	100	100
Tiantang	11	8	80	80	80	80	80	80	80	80
Tiantang	11	7	100	100	100	100	100	100	100	100
Tiantang	11	6	100	100	100	100	100	100	100	100
Tiantang	11	5	60	60	40	40	40	40	40	40
Tiantang	11	4	100	100	100	100	100	100	100	100
Tiantang	11	3	80	80	80	80	80	80	80	80
Tiantang	11	2	60	60	60	60	60	60	60	60
Tiantang	11	1	100	100	100	100	100	100	80	80
Tiantang	10	10	100	100	100	100	80	80	80	80
Tiantang	10	9	100	100	100	100	100	80	80	80
Tiantang	10	8	100	100	100	100	80	80	80	80
Tiantang	10	7	100	100	100	100	100	100	100	60
Tiantang	10	6	100	100	100	100	100	100	100	60
Tiantang	10	5	100	100	100	100	100	100	100	100
Tiantang	10	4	100	100	100	100	100	100	100	100
Tiantang	10	3	100	100	100	100	100	100	100	100
Tiantang	10	2	100	100	100	100	100	100	100	80
Tiantang	10	1	100	100	100	100	100	100	100	100
Tiantang	9	10	100	100	100	100	100	80	80	80
Tiantang	9	9	100	100	100	100	100	100	100	100
Tiantang	9	8	100	100	100	100	100	100	100	100
Tiantang	9	7	100	100	100	100	100	80	80	80
Tiantang	9	6	100	100	100	100	100	80	80	80
Tiantang	9	5	100	100	100	100	100	80	40	40
Tiantang	9	4	100	100	100	100	100	100	80	60
Tiantang	9	3	100	100	100	100	80	80	80	60
Tiantang	9	2	100	100	100	100	100	100	100	60
Tiantang	9	1	100	100	100	100	100	100	80	60
Tiantang	8	10	100	100	100	100	100	100	NA	NA
Tiantang	8	9	100	100	100	100	100	100	100	100
Tiantang	8	8	100	100	100	100	100	100	40	40
Tiantang	8	7	100	100	100	100	100	100	NA	NA
Tiantang	8	6	100	100	100	100	100	100	20	20
Tiantang	8	5	100	100	100	100	100	80	40	40
Tiantang	8	4	100	100	100	100	100	80	40	40
Tiantang	8	3	100	100	100	100	100	100	20	NA
Tiantang	8	2	60	60	60	20	NA	NA	NA	NA
Tiantang	8	1	80	80	80	80	60	20	20	NA
Tiantang	7	10	100	100	100	100	100	100	100	100
Tiantang	7	9	100	100	100	100	100	100	100	100
Tiantang	7	8	100	100	100	100	100	100	100	100
Tiantang	7	7	100	100	100	100	100	100	100	100
Tiantang	7	6	100	100	100	100	100	100	100	100
Tiantang	7	5	100	100	100	100	100	100	80	80
Tiantang	7	4	100	100	100	100	100	100	40	40
Tiantang	7	3	100	100	100	100	100	100	100	100
Tiantang	7	2	100	100	100	100	100	100	80	100
Tiantang	7	1	80	80	80	60	80	80	80	80
Tiantang	6	10	100	100	100	60	NA	NA	NA	NA
Tiantang	6	9	100	100	100	40	20	NA	NA	NA
Tiantang	6	8	80	80	80	60	NA	NA	NA	NA
Tiantang	6	7	100	100	100	100	100	40	NA	NA
Tiantang	6	6	100	100	100	100	40	NA	NA	NA
Tiantang	6	5	80	80	80	80	40	NA	NA	NA
Tiantang	6	4	100	100	100	100	60	60	60	60
Tiantang	6	3	100	100	100	80	20	20	NA	NA
Tiantang	6	2	100	80	80	60	20	NA	NA	NA
Tiantang	6	1	80	80	80	80	60	20	NA	NA
Tiantang	5	10	60	60	60	20	20	20	20	20
Tiantang	5	9	40	40	20	20	20	20	20	20
Tiantang	5	8	40	40	40	40	40	40	40	40
Tiantang	5	7	100	100	80	60	40	40	40	40
Tiantang	5	6	80	80	60	60	60	40	40	40
Tiantang	5	5	60	60	60	60	60	60	60	60
Tiantang	5	4	80	80	80	80	80	80	60	60
Tiantang	5	3	60	60	40	20	20	20	20	20
Tiantang	5	1	80	80	80	80	60	60	60	60
Tiantang	4	10	60	60	40	40	20	NA	NA	NA
Tiantang	4	9	100	100	80	80	80	80	60	60
Tiantang	4	8	100	100	100	100	80	80	80	80
Tiantang	4	7	100	100	100	100	80	80	80	80
Tiantang	4	6	100	100	100	100	100	100	100	100
Tiantang	4	5	100	100	100	100	100	100	60	60
Tiantang	4	4	100	100	100	80	80	60	20	20
Tiantang	4	3	100	100	100	100	100	100	80	80
Tiantang	4	1	100	100	80	80	80	80	80	80
Tiantang	3	10	80	80	20	NA	NA	NA	NA	NA
Tiantang	3	9	80	80	80	80	80	80	80	80
Tiantang	3	8	100	100	80	80	80	80	80	80
Tiantang	3	7	100	100	100	100	100	100	100	100
Tiantang	3	6	100	100	100	100	100	100	100	100
Tiantang	3	5	100	100	100	100	100	100	100	100
Tiantang	3	4	100	80	80	60	60	20	NA	NA
Tiantang	3	3	80	80	40	40	40	40	40	40
Tiantang	3	2	60	60	40	20	20	20	20	20
Tiantang	3	1	80	80	40	20	20	NA	NA	NA
Tiantang	2	10	100	100	100	100	100	80	60	40
Tiantang	2	9	100	100	100	100	100	100	60	60
Tiantang	2	8	100	100	100	100	100	100	40	20
Tiantang	2	7	100	100	100	100	100	100	20	NA
Tiantang	2	6	100	100	100	100	100	100	40	20
Tiantang	2	5	100	100	100	100	100	100	20	NA
Tiantang	2	4	80	80	80	80	80	40	40	20
Tiantang	2	3	100	100	100	100	100	80	40	40
Tiantang	2	2	80	60	60	60	60	60	60	60
Tiantang	2	1	80	80	80	80	80	80	60	60
Tiantang	1	10	80	80	80	80	80	80	80	80
Tiantang	1	9	100	100	100	100	100	100	80	80
Tiantang	1	8	80	80	80	80	80	80	60	60
Tiantang	1	7	60	60	60	60	60	60	60	60
Tiantang	1	6	100	100	100	100	100	80	80	60
Tiantang	1	5	100	100	100	100	80	80	60	60
Tiantang	1	4	100	100	100	100	80	80	20	20
Tiantang	1	3	100	100	100	100	100	100	100	100
Tiantang	1	2	80	80	80	80	80	80	60	40
Tiantang	1	1	100	100	100	100	100	100	100	100
Xiniujiao	20	7	40	20	NA	NA	NA	NA	NA	NA
Xiniujiao	20	6	80	60	60	NA	NA	NA	NA	NA
Xiniujiao	20	5	40	40	40	40	40	40	NA	NA
Xiniujiao	20	4	100	100	100	60	60	60	NA	NA
Xiniujiao	20	3	100	100	100	100	100	100	100	80
Xiniujiao	20	2	60	60	60	40	40	40	60	60
Xiniujiao	20	1	80	80	80	80	80	80	60	60
Xiniujiao	19	9	80	80	NA	NA	NA	NA	NA	NA
Xiniujiao	19	8	100	100	NA	NA	NA	NA	NA	NA
Xiniujiao	19	7	100	100	NA	NA	NA	NA	NA	NA
Xiniujiao	19	6	100	100	100	100	100	80	NA	NA
Xiniujiao	19	5	100	80	80	80	80	80	NA	NA
Xiniujiao	19	4	100	100	100	100	100	100	100	100
Xiniujiao	19	3	60	60	60	60	60	60	60	60
Xiniujiao	19	2	60	60	60	60	60	60	60	60
Xiniujiao	19	1	100	100	100	80	80	80	60	60
Xiniujiao	18	10	40	40	40	NA	NA	NA	NA	NA
Xiniujiao	18	9	40	40	40	40	40	10	NA	NA
Xiniujiao	18	8	100	100	100	80	80	80	80	80
Xiniujiao	18	7	100	100	100	100	100	100	100	100
Xiniujiao	18	6	80	80	80	80	80	80	80	80
Xiniujiao	18	5	100	100	100	60	60	60	60	60
Xiniujiao	18	4	40	40	40	40	40	40	40	40
Xiniujiao	18	3	100	80	80	80	80	60	60	40
Xiniujiao	18	2	100	80	80	80	80	60	60	60
Xiniujiao	18	1	60	40	NA	NA	NA	NA	NA	NA
Xiniujiao	17	6	80	80	NA	NA	NA	NA	NA	NA
Xiniujiao	17	5	40	40	40	NA	NA	NA	NA	NA
Xiniujiao	17	4	100	100	100	40	40	40	NA	NA
Xiniujiao	17	3	80	80	80	80	80	80	80	80
Xiniujiao	17	2	100	100	100	100	100	80	80	80
Xiniujiao	17	1	100	100	100	100	100	100	100	100
Xiniujiao	16	10	60	60	NA	NA	NA	NA	NA	NA
Xiniujiao	16	9	40	40	40	NA	NA	NA	NA	NA
Xiniujiao	16	8	100	100	100	100	100	100	NA	NA
Xiniujiao	16	7	80	80	80	80	80	80	NA	NA
Xiniujiao	16	6	60	60	60	60	60	60	40	40
Xiniujiao	16	5	80	80	80	80	80	80	80	80
Xiniujiao	16	4	80	80	60	60	60	60	40	40
Xiniujiao	16	3	100	100	80	80	80	60	60	60
Xiniujiao	16	2	100	100	100	100	100	100	100	100
Xiniujiao	16	1	80	80	60	60	60	60	60	60
Xiniujiao	15	10	80	80	60	20	20	20	NA	NA
Xiniujiao	15	9	80	80	80	80	80	80	NA	NA
Xiniujiao	15	8	40	40	40	40	40	40	NA	NA
Xiniujiao	15	7	40	40	40	40	40	40	40	40
Xiniujiao	15	6	80	80	80	80	80	80	80	80
Xiniujiao	15	5	80	80	80	80	80	60	80	80
Xiniujiao	15	4	60	60	60	60	60	60	60	60
Xiniujiao	15	3	80	40	20	20	20	20	20	20
Xiniujiao	15	2	100	100	100	80	80	80	60	60
Xiniujiao	15	1	80	80	80	80	80	60	60	60
Xiniujiao	14	10	80	80	NA	NA	NA	NA	NA	NA
Xiniujiao	14	9	60	NA	NA	NA	NA	NA	NA	NA
Xiniujiao	14	8	20	20	NA	NA	NA	NA	NA	NA
Xiniujiao	14	7	60	60	60	40	40	40	NA	NA
Xiniujiao	14	6	20	20	20	NA	NA	NA	NA	NA
Xiniujiao	14	5	100	100	80	80	80	80	NA	NA
Xiniujiao	14	4	60	60	60	60	60	60	NA	NA
Xiniujiao	14	3	80	80	80	60	60	60	60	60
Xiniujiao	14	2	100	60	60	60	60	60	60	60
Xiniujiao	14	1	100	100	100	100	80	80	80	80
Xiniujiao	13	8	100	100	NA	NA	NA	NA	NA	NA
Xiniujiao	13	7	80	80	80	80	80	NA	NA	NA
Xiniujiao	13	6	40	40	40	40	40	40	NA	NA
Xiniujiao	13	5	40	40	40	40	40	40	NA	NA
Xiniujiao	13	4	100	80	60	60	60	60	60	60
Xiniujiao	13	3	80	80	80	60	60	60	60	40
Xiniujiao	13	2	80	60	60	60	60	60	60	40
Xiniujiao	13	1	60	60	60	60	60	60	40	40
Xiniujiao	12	8	20	20	NA	NA	NA	NA	NA	NA
Xiniujiao	12	7	60	60	60	60	60	60	NA	NA
Xiniujiao	12	6	60	60	60	60	60	60	NA	NA
Xiniujiao	12	5	60	60	60	60	60	60	60	60
Xiniujiao	12	4	60	60	20	60	60	60	60	60
Xiniujiao	12	3	80	80	80	80	80	80	80	60
Xiniujiao	12	2	100	100	100	100	100	100	100	100
Xiniujiao	12	1	100	100	100	100	80	60	60	60
Xiniujiao	11	8	60	60	40	NA	NA	NA	NA	NA
Xiniujiao	11	7	100	100	80	60	40	NA	NA	NA
Xiniujiao	11	6	60	40	40	40	40	20	NA	NA
Xiniujiao	11	5	100	60	60	60	60	NA	NA	NA
Xiniujiao	11	4	80	80	80	80	60	60	NA	NA
Xiniujiao	11	3	100	100	80	60	60	60	60	60
Xiniujiao	11	2	100	100	100	100	100	60	60	60
Xiniujiao	11	1	100	100	100	100	100	100	60	40
Xiniujiao	10	10	100	100	60	20	20	20	NA	NA
Xiniujiao	10	9	80	80	80	80	80	80	40	40
Xiniujiao	10	8	100	100	100	80	80	80	80	80
Xiniujiao	10	7	100	100	100	100	100	100	100	80
Xiniujiao	10	6	80	80	80	80	80	80	40	40
Xiniujiao	10	5	40	40	40	40	40	40	40	40
Xiniujiao	10	4	80	80	80	40	40	40	40	40
Xiniujiao	10	3	100	80	80	80	80	80	80	80
Xiniujiao	10	2	100	100	100	80	60	20	20	20
Xiniujiao	10	1	100	100	100	100	40	40	40	40
Xiniujiao	9	8	80	80	80	60	60	60	60	60
Xiniujiao	9	7	100	100	100	100	100	100	80	60
Xiniujiao	9	6	100	80	80	80	80	80	80	80
Xiniujiao	9	5	80	80	80	80	80	60	60	60
Xiniujiao	9	4	80	80	80	40	40	40	40	40
Xiniujiao	9	3	80	80	80	80	80	80	80	60
Xiniujiao	9	2	80	80	80	60	60	60	60	60
Xiniujiao	9	1	80	80	80	80	80	80	80	80
Xiniujiao	8	10	100	100	80	60	60	60	60	60
Xiniujiao	8	9	100	100	60	60	60	60	60	60
Xiniujiao	8	8	80	80	40	40	40	40	40	40
Xiniujiao	8	7	60	60	60	60	60	40	40	20
Xiniujiao	8	6	60	60	60	40	40	40	20	20
Xiniujiao	8	5	100	100	100	80	80	80	80	80
Xiniujiao	8	4	60	60	40	40	40	40	40	40
Xiniujiao	8	3	100	100	100	40	40	40	40	NA
Xiniujiao	8	2	40	40	NA	NA	NA	NA	NA	NA
Xiniujiao	8	1	60	60	40	40	20	20	20	20
Xiniujiao	7	10	60	60	NA	NA	NA	NA	NA	NA
Xiniujiao	7	9	100	80	80	80	80	80	80	NA
Xiniujiao	7	8	80	80	80	60	60	60	60	60
Xiniujiao	7	7	60	60	60	60	60	60	60	60
Xiniujiao	7	6	100	100	100	40	40	40	40	40
Xiniujiao	7	5	100	100	100	40	40	40	40	40
Xiniujiao	7	4	100	80	80	80	80	80	80	80
Xiniujiao	7	3	100	100	100	100	100	100	100	60
Xiniujiao	7	2	60	60	60	60	60	60	60	60
Xiniujiao	7	1	60	60	60	60	60	60	60	60
Xiniujiao	6	10	60	NA	NA	NA	NA	NA	NA	NA
Xiniujiao	6	9	80	80	80	80	80	80	60	60
Xiniujiao	6	8	60	60	40	40	40	20	20	20
Xiniujiao	6	7	60	60	60	60	60	40	40	NA
Xiniujiao	6	6	100	100	100	100	100	80	80	60
Xiniujiao	6	5	60	40	40	40	40	40	40	40
Xiniujiao	6	4	60	60	60	60	60	40	40	20
Xiniujiao	6	3	80	80	80	80	80	60	60	60
Xiniujiao	6	2	80	80	80	80	80	80	80	40
Xiniujiao	6	1	60	60	60	60	60	40	40	40
Xiniujiao	5	9	40	40	40	40	40	40	NA	NA
Xiniujiao	5	8	60	60	40	20	20	20	20	20
Xiniujiao	5	7	40	40	40	20	20	20	20	20
Xiniujiao	5	6	20	20	20	20	20	20	20	20
Xiniujiao	5	5	40	40	40	20	20	20	20	20
Xiniujiao	5	4	20	20	20	20	20	20	20	20
Xiniujiao	5	3	80	80	80	80	80	60	60	60
Xiniujiao	5	2	60	60	60	60	60	40	40	40
Xiniujiao	5	1	60	60	60	60	NA	NA	NA	NA
Xiniujiao	4	9	100	100	100	80	80	80	80	NA
Xiniujiao	4	8	40	40	40	40	40	40	40	40
Xiniujiao	4	7	80	80	80	80	60	40	40	40
Xiniujiao	4	6	100	100	100	80	80	80	80	60
Xiniujiao	4	5	60	40	40	40	40	20	20	20
Xiniujiao	4	4	100	80	80	80	80	80	80	40
Xiniujiao	4	3	60	60	60	60	60	60	60	60
Xiniujiao	4	2	100	100	100	100	100	80	80	40
Xiniujiao	4	1	60	40	40	40	40	40	40	40
Xiniujiao	3	10	100	100	100	100	100	100	NA	NA
Xiniujiao	3	9	100	100	80	80	80	20	NA	NA
Xiniujiao	3	8	100	100	40	20	NA	NA	NA	NA
Xiniujiao	3	7	60	60	60	60	60	20	20	20
Xiniujiao	3	6	80	80	80	80	80	80	80	80
Xiniujiao	3	5	80	80	80	NA	NA	NA	NA	NA
Xiniujiao	3	4	100	60	40	40	40	40	40	40
Xiniujiao	3	3	60	60	60	40	40	40	40	20
Xiniujiao	3	2	20	20	20	20	20	20	20	20
Xiniujiao	3	1	100	100	100	100	100	100	100	100
Xiniujiao	2	10	80	80	60	40	40	40	40	40
Xiniujiao	2	9	80	80	80	80	80	80	40	40
Xiniujiao	2	8	80	80	40	40	40	40	40	40
Xiniujiao	2	7	80	80	60	60	60	40	40	40
Xiniujiao	2	6	80	80	80	40	40	40	20	20
Xiniujiao	2	5	80	80	80	80	80	80	80	80
Xiniujiao	2	4	80	60	60	60	60	60	60	60
Xiniujiao	2	3	40	40	40	20	20	20	20	20
Xiniujiao	2	2	60	60	40	40	40	40	40	40
Xiniujiao	2	1	100	100	100	100	100	100	100	100
Xiniujiao	1	10	80	80	60	60	60	60	60	NA
Xiniujiao	1	9	60	60	60	60	60	60	60	60
Xiniujiao	1	8	80	80	80	80	80	80	80	NA
Xiniujiao	1	7	80	80	80	20	20	20	20	20
Xiniujiao	1	6	40	40	40	40	40	40	40	20
Xiniujiao	1	5	80	80	80	40	40	40	40	40
Xiniujiao	1	4	80	80	80	40	40	40	40	40
Xiniujiao	1	3	20	20	20	20	20	20	20	20
Xiniujiao	1	2	40	40	40	NA	NA	NA	NA	NA
Xiniujiao	1	1	60	60	40	40	40	40	40	40
