# Supplementary material for: Age trends of genetic parameters and genotype-by-environment interactions for growth traits of Eucalyptus urophylla clones in South-China
Source: PeerJ. 2024 Oct 15;12:e18218. doi: 10.7717/peerj.18218 (PMC11488493; doi:10.7717/peerj.18218)
Supplement: Supplemental Information 2 [file peerj-12-18218-s002.xlsx]

## Sheet: Growth traits
Clones NO.	Tree age (year)	Shankou			Tiantang			Xiniujiao
		Tree hegiht (m)	Diameter at breast height over bark (cm)	Individual tree volume over bark (m3)	Tree hegiht (m)	Diameter at breast height over bark (cm)	Individual tree volume over bark (m3)	Tree hegiht (m)	Diameter at breast height over bark (cm)	Individual tree volume over bark (m3)
1	0.5	2.24	0.95	8.81e-05	2.17368	0.81842	8.842e-05	2.37	1.38	0.0002159
2	0.5	2.27	1.11	0.0001167	1.97692	0.76154	5.026e-05	2.2	1.21	0.0001424
3	0.5	2.48	1.5	0.0002479	2.25	1.2925	0.00014175	2.2	1.3	0.0001489
4	0.5	2.26	1.12	0.0001166	2.21795	1.12564	0.00011718	2.49	1.53	0.0003056
5	0.5	2.33	1.17	0.0001405	2.20909	1.06364	0.00011455	1.975	0.86	8.13e-05
6	0.5	2.24	1.04	9.66e-05	2.07273	0.825	6.068e-05	2.34	1.4	0.0001905
7	0.5	2.74	1.78	0.0003156	2.52128	1.59574	0.00023787	2.79	1.8	0.0003733
8	0.5	2.48	1.44	0.0002104	2.10976	0.89512	8.463e-05	2.47	1.28	0.0002371
9	0.5	2.22	1.06	9.61e-05	2.05682	0.92273	7.25e-05	2.23	1.29	0.0001633
10	0.5	2.4	1.36	0.0001727	2.084	0.906	6.84e-05	2.25	1.23	0.0001714
11	0.5	2.27	0.94	9.54e-05	2.07209	0.84186	6.395e-05	2.4	1.36	0.0002322
12	0.5	2.67	1.45	0.0002188	2.59388	1.57959	0.00025061	2.68	1.63	0.0003658
13	0.5	2.42	1.16	0.0001229	2.48261	1.19348	0.00013848	2.59	1.46	0.0003226
14	0.5	2.58	1.41	0.0002345	2.76444	1.72	0.00030844	2.25	1.25	0.0002032
15	0.5	2.27	1.07	0.0001105	2.39149	1.27234	0.00017128	2.11	0.99	0.0001079
16	0.5	2.23	0.86	6.87e-05	2.11212	0.8303	6.364e-05	2.41	1.31	0.0001818
17	0.5	2.75	1.55	0.0002507	2.944	1.708	0.0003346	2.71	1.65	0.0003305
18	0.5	2.54	1.3	0.0001783	2.522	1.428	0.0002008	2.5	1.41	0.0002221
19	0.5	2.23	0.99	8.85e-05	2.36042	1.28125	0.00014625	2.17	1.08	0.0001152
20	0.5	2.6	1.39	0.0002102	2.76939	1.50816	0.00025102	2.51	1.32	0.0002041
1	1	3.6	3.55	0.001595	3.18182	2.7455	0.0009232	3.28	3.66	0.001709
2	1	3.59	3.82	0.001933	2.94783	2.7957	0.0008611	3.16	3.49	0.001431
3	1	4.12	4.4	0.00294	3.53488	3.614	0.00167	3.1	3.35	0.001304
4	1	3.91	3.85	0.002043	3.40465	3.1512	0.0012198	3.45	3.68	0.001922
5	1	3.67	3.89	0.002032	3.12963	3.0778	0.0011633	2.84	2.85	0.00089
6	1	3.71	3.97	0.00203	3.13478	2.937	0.0009565	3.09	3.25	0.001219
7	1	4.39	4.3	0.002778	3.85714	3.5653	0.0017406	4	4.25	0.002716
8	1	4.19	4.28	0.002699	3.39362	3.0872	0.0012068	3.27	3.44	0.001621
9	1	3.79	3.85	0.001981	3.10408	3.1286	0.0011086	3.4	3.9	0.001911
10	1	3.91	3.88	0.002032	3.204	2.832	0.0008902	3.1	3.38	0.001503
11	1	3.86	3.87	0.002105	3.1825	3.105	0.0011015	3.38	3.7	0.001801
12	1	5.06	4.53	0.003545	4.426	3.918	0.0023652	4.1	4.23	0.002778
13	1	4.21	4.13	0.002664	3.65957	3.5277	0.0016289	4.23	4.26	0.003025
14	1	4.73	4.43	0.003319	4.275	3.8896	0.0022958	3.44	3.58	0.001619
15	1	3.92	3.97	0.002282	3.51837	3.698	0.001738	3.11	3.18	0.00122
16	1	3.72	3.53	0.001847	2.94565	2.8283	0.0009304	3.43	3.74	0.001876
17	1	4.76	4.29	0.003186	4.132	3.8	0.0020958	3.88	4.02	0.00238
18	1	4.74	4.21	0.002946	4.328	3.812	0.0021934	3.81	3.82	0.0021
19	1	3.98	4.18	0.002471	3.50612	3.7449	0.0016965	3.36	3.47	0.001575
20	1	4.52	3.91	0.002493	4.156	3.368	0.001659	3.47	3.48	0.001563
1	1.5	6.79	6.0729	0.0088088	6.9652	5.3152	0.0071739	6.25	6.27	0.01042
2	1.5	5.77	6.678	0.0089526	5.4652	5.6783	0.006173	6.03	6.08	0.00946
3	1.5	7.07	6.3893	0.0106296	6.903	6.0788	0.0090897	5.59	5.54	0.00703
4	1.5	7.7	6.9681	0.0127074	7.4575	5.8275	0.0087895	6.29	6.1	0.00955
5	1.5	6.67	6.4167	0.0096343	6.3192	5.4077	0.0075054	4.65	4.97	0.00524
6	1.5	6.52	6.5313	0.0094685	5.8935	5.0913	0.0053059	5.82	6.1	0.00807
7	1.5	7.92	6.714	0.012115	7.5796	6.351	0.0104461	6.83	6.92	0.01183
8	1.5	7.92	6.4837	0.011399	7.0362	5.6511	0.0079011	6.59	6.29	0.01018
9	1.5	7.18	7.0468	0.0121047	6.812	5.918	0.0082998	6.91	6.99	0.01263
10	1.5	7.51	6.532	0.0108194	6.682	5.792	0.0075692	6.16	6.03	0.00875
11	1.5	8.56	6.8042	0.0134231	7.4023	6.2465	0.0101814	7.13	7.13	0.01329
12	1.5	9.41	7.378	0.0172662	8.6265	6.8429	0.0137051	7.96	7.86	0.0167
13	1.5	8.35	7.0735	0.0144702	7.6146	6.3917	0.0108363	7.42	7.65	0.01717
14	1.5	9.41	6.9479	0.015636	8.8022	6.68	0.0135424	7.14	7.16	0.01266
15	1.5	9.41	7.25	0.0169079	8.7143	7.1286	0.0152827	6.43	6.47	0.00982
16	1.5	7.49	6.5894	0.0111938	7.0733	5.4133	0.0074342	7	7.31	0.01335
17	1.5	8.92	7.1467	0.0158611	8.746	7.182	0.0153856	7.21	7.59	0.0147
18	1.5	9.09	7.3653	0.0167322	8.464	6.794	0.0133236	7.35	7.31	0.01423
19	1.5	7.83	7.0204	0.0134106	7.274	6.618	0.011025	6.05	6.67	0.00997
20	1.5	8.43	6.3979	0.0118388	8.09	5.834	0.009472	6.93	6.73	0.01091
1	2.5	9.5771	7.4667	0.019404	10.4447	7.5021	0.020829	7.69	7.68	0.018
2	2.5	8.12	8.116	0.018216	8.9022	8.3289	0.020958	8.79	9.41	0.0293
3	2.5	9.35	8.8125	0.027505	12.1433	9.5933	0.038484	7.69	8.3	0.0229
4	2.5	10.525	9.525	0.032758	11.8872	8.9179	0.033355	7.56	7.77	0.0252
5	2.5	9.5683	8.4537	0.02565	10.7143	8.5429	0.029325	6.2	6.7	0.0135
6	2.5	7.6735	7.5102	0.015506	8.1474	6.4579	0.011948	8.52	9.16	0.027
7	2.5	12.0449	8.998	0.033309	12.2813	9.1208	0.034839	9.87	9.72	0.0349
8	2.5	10.698	8.456	0.026304	10.7156	7.8911	0.023211	8.24	8.15	0.0234
9	2.5	10.8957	9.1574	0.031956	11.142	9.428	0.033872	9.46	10.03	0.037
10	2.5	10.636	8.404	0.025725	10.294	7.956	0.022375	8.75	9.29	0.03
11	2.5	12.0854	9.6438	0.038377	11.986	10.0326	0.041728	10.27	11.37	0.0467
12	2.5	13.144	9.954	0.044123	13.902	10.55	0.052314	10.35	9.94	0.0381
13	2.5	11.4245	9.4	0.035191	12.0813	10.1917	0.043484	9.83	10.83	0.0447
14	2.5	12.6872	9.6362	0.03986	13.6523	10.5432	0.051695	9.32	9.68	0.0329
15	2.5	12.4273	10.1455	0.044484	14.875	11.6958	0.069547	10.52	11.03	0.047
16	2.5	11.9761	8.637	0.032142	12.869	8.7881	0.034509	9.39	9.19	0.0313
17	2.5	13.2841	10.1386	0.046125	14.182	11.066	0.058597	8.11	8.26	0.0215
18	2.5	13.0367	9.9163	0.043756	13.75	10.222	0.048837	9.95	10.63	0.0431
19	2.5	11.6122	9.6449	0.036418	11.234	9.55	0.035454	9.24	10.78	0.0389
20	2.5	11.5277	8.8362	0.031016	11.754	8.368	0.027989	9.32	10.24	0.0342
1	3.5	12.0128	8.6915	0.03404	14.0591	8.5818	0.036655	11.06	10.17	0.0437
2	3.5	10.1404	9.0255	0.029195	12.8085	9.2681	0.038664	10.42	10.81	0.045
3	3.5	14.8188	11.5563	0.07384	15.9	10.8357	0.067127	9.8	10.45	0.0413
4	3.5	15.1795	11.3545	0.066961	15.8222	10.0806	0.058046	10.51	10.39	0.0481
5	3.5	11.6976	9.7214	0.044663	14.425	9.765	0.05377	8.87	9.84	0.0341
6	3.5	8.5522	8.8609	0.028525	9.5611	6.8889	0.015977	10.98	10.77	0.049
7	3.5	17.04	10.582	0.066404	16.8673	10.4306	0.063195	12.23	11.91	0.063
8	3.5	13.18	9.262	0.041285	13.5907	8.6	0.036065	10.41	9.871	0.0413
9	3.5	15.5304	10.6522	0.063511	16.351	10.5939	0.063731	13.71	12.47	0.0788
10	3.5	15.1551	9.3816	0.046466	14.5229	8.7958	0.039049	12.4	11.46	0.0615
11	3.5	17.3188	11.5771	0.080233	17.3	11.9535	0.085499	13.89	12.72	0.0785
12	3.5	18.666	11.574	0.085137	19.528	12.384	0.101178	14.4	11.79	0.0736
13	3.5	15.4041	11.0327	0.066549	17.8043	12.0681	0.088605	12.69	11.97	0.0681
14	3.5	17.2125	10.7417	0.067488	18.5568	11.9477	0.09052	11.7	11.16	0.0543
15	3.5	16.6847	11.8911	0.082804	18.9739	13.7978	0.123443	13.4	12.81	0.081
16	3.5	14.9087	9.8239	0.053086	16.5209	10.4512	0.063412	12.36	10.83	0.0553
17	3.5	18.6652	11.313	0.083352	18.942	12.704	0.103565	10.33	10.08	0.0395
18	3.5	17.949	11.4061	0.079798	19.15	12.002	0.094206	13.67	12.32	0.0783
19	3.5	15.546	10.822	0.063695	15.1633	10.7837	0.06185	12.74	12.01	0.0655
20	3.5	15.0936	9.9106	0.052647	15.644	9.442	0.047671	10.81	11.19	0.0477
1	4.7	15.1805	11.1902	0.070585	15.0952	9.6048	0.048905	13.85	11.6	0.0695
2	4.7	14.4114	10.2629	0.053841	14.1	10.4628	0.053634	14.49	12.56	0.0822
3	4.7	16.01	11.5167	0.087086	17.5333	12.5148	0.100102	13.75	11.98	0.0733
4	4.7	17.09	12.57	0.098341	17.9086	11.5114	0.084982	14.31	12.05	0.0759
5	4.7	15.786	12.2047	0.089046	15.6526	11.6158	0.080671	13.68	12.13	0.0727
6	4.7	13.1737	10.4316	0.058005	8.94	7.58	0.017142	16.28	13.19	0.0964
7	4.7	19.8765	12.1676	0.103383	19.9245	11.698	0.096049	16.75	13.44	0.1087
8	4.7	17.5762	11.4119	0.082834	13.1333	9.4282	0.043228	13.81	10.68	0.0602
9	4.7	16.5698	11.3837	0.08154	16.2178	11.8578	0.07945	16.89	14.69	0.1263
10	4.7	17.3021	10.6104	0.071751	15.1617	9.6085	0.048971	14.93	11.91	0.0747
11	4.7	19.708	13.004	0.11682	19.3186	13.8465	0.128819	16.77	14.04	0.1154
12	4.7	20.0417	12.7417	0.113737	22.7959	13.9163	0.150184	16.83	11.7	0.0869
13	4.7	19.622	12.9	0.113285	19.4467	14.0467	0.131186	16.99	13.98	0.1174
14	4.7	18.125	11.8438	0.090072	20.1227	13.4864	0.126671	14.98	12.54	0.0843
15	4.7	19.0289	12.6289	0.109337	21.7535	15.7442	0.186668	16.05	13.59	0.1058
16	4.7	17.8067	12.0222	0.094703	17.007	11.6512	0.08279	15.15	12.48	0.0871
17	4.7	19.3652	12.1652	0.106126	21.962	14.904	0.166128	17.01	14.85	0.1278
18	4.7	19.0556	12.4844	0.106562	21.564	13.432	0.134295	16.53	13.23	0.1081
19	4.7	17.0375	11.7083	0.081855	15.7958	11.8917	0.079141	15.44	13.48	0.102
20	4.7	17.8694	11.7878	0.087643	15.926	10.41	0.059657	14.56	11.38	0.0659
1	5.7	16.1188	11.2313	0.46108	15.9946	10.2314	0.05737	16.07	12.89	0.09474
2	5.7	15.975	11.15	0.07937	15.9609	12.3826	0.08445	16.42	13.72	0.10987
3	5.7	17.6	13.8	0.12717	18.5231	12.9192	0.1099	15.69	12.47	0.09191
4	5.7	17.8563	13.225	0.11201	17.2724	12.1828	0.08829	15.66	13.33	0.11021
5	5.7	17.85	12.6583	0.10249	14.5632	11.1263	0.06932	14.69	13.18	0.0929
6	5.7	17.8571	12.6	0.09894	17.7	13.9	0.11414	16.66	13.19	0.10466
7	5.7	19.5674	12.2652	0.10533	18.4659	12.1364	0.09308	16.98	13.02	0.10463
8	5.7	16.5607	10.9893	0.07704	16.2357	10.9286	0.06779	16.19	12.21	0.08918
9	5.7	18.3564	13.1	0.11427	16.4683	11.822	0.08219	16.75	13.97	0.11692
10	5.7	17.5776	10.6918	0.07261	14.9872	9.8149	0.05	16.58	12.88	0.10179
11	5.7	20.4895	13.6368	0.1359	18.8646	14.3462	0.13303	17.61	13.76	0.11692
12	5.7	20.7255	12.9702	0.12204	20.6604	14.1021	0.13993	16.74	12.86	0.10307
13	5.7	18.2289	12.96	0.11094	18.936	14.6512	0.13763	16.09	12.17	0.08887
14	5.7	19.0455	12.1023	0.09772	18.4819	13.7605	0.12125	18.38	13.41	0.11353
15	5.7	19.4356	13.6778	0.13262	20.3714	16.3095	0.1866	18.54	14.94	0.14282
16	5.7	17.2136	11.1205	0.07824	17.8088	12.4405	0.09662	17.97	13.88	0.12788
17	5.7	20.8119	13.1238	0.12946	21.492	15.544	0.17598	18.75	15.4	0.15598
18	5.7	19.9596	12.8745	0.11651	20.7451	13.6021	0.13202	16.87	12.55	0.09688
19	5.7	17.1429	12.3833	0.09197	16.3304	11.8674	0.07939	14.79	11.17	0.06976
20	5.7	16.6146	10.9488	0.07157	16.2609	10.6598	0.06502	15.61	11.46	0.07979
1	7.9	17.82	14.007	0.13895	17.4676	11.8	0.08774	17.85	14.33	0.1244
2	7.9	19.2333	15.417	0.17856	17.8438	13.2188	0.1108	17.43	14.76	0.1355
3	7.9	17.15	14.35	0.16852	20.7654	14.8854	0.16656	17.27	13.74	0.1186
4	7.9	19.65	16.531	0.19323	19.1759	13.6034	0.1225	18.06	15.53	0.155
5	7.9	19.26	15.29	0.16067	17.125	12.925	0.11365	16.62	14.48	0.1214
6	7.9	18.6375	14.6	0.13945	19.9	15.6	0.16567	17.94	14.45	0.1325
7	7.9	20.8174	15.383	0.18162	20.2289	13.8778	0.13494	18.71	14.51	0.1393
8	7.9	20.15	15.667	0.18192	19.0176	12.9176	0.11095	16.63	12.56	0.0996
9	7.9	19.5769	15.4	0.16692	19.0778	13.7361	0.12548	18.07	15.37	0.1519
10	7.9	18.8633	12.651	0.10961	17.2738	11.55	0.08493	18.39	14.66	0.1365
11	7.9	21.45	16.242	0.20223	21.8195	17.1756	0.22082	18.62	15.2	0.1537
12	7.9	21.6957	14.745	0.16537	22.4383	16.1021	0.19892	18.53	14.51	0.139
13	7.9	19.7591	15.541	0.17595	22.4929	17.6667	0.24098	18.09	13.71	0.1214
14	7.9	20.4306	14.319	0.14484	21.045	15.93	0.18643	19.49	14.51	0.1405
15	7.9	20.5889	15.784	0.18601	23.4936	18.6234	0.28593	19.99	16.31	0.1827
16	7.9	18.3683	13.159	0.11625	20.6436	13.9487	0.14332	19.54	15.46	0.1642
17	7.9	21.9707	15.573	0.19336	23.314	17.196	0.24154	19.49	16.37	0.1818
18	7.9	21.3568	15.355	0.17527	21.7217	14.9978	0.17125	18.7	14.2	0.1328
19	7.9	18.8538	14.413	0.13797	17.8682	12.7341	0.10111	16.23	12.36	0.0914
20	7.9	18.0184	12.4	0.10176	17.7767	11.6953	0.08674	17.61	13.2	0.1147
