# Supplementary material for: Age trends of genetic parameters and genotype-by-environment interactions for growth traits of Eucalyptus urophylla clones in South-China
Source: PeerJ. 2024 Oct 15;12:e18218. doi: 10.7717/peerj.18218 (PMC11488493; doi:10.7717/peerj.18218)
Supplement: Supplemental Information 3 [file peerj-12-18218-s003.xlsx]

## Sheet: Sheet1
Growth traits	Location	The repeatability of each age (year)
		0.5	1	1.5	2.5	3.5	4.7	5.7	7.9
Tree hegiht (m)	Shankou	0.437	0.678	0.934	0.944	0.969	0.937	0.97	0.968
	Tiantang	0.966	0.94	0.961	0.963	0.971	0.973	0.972	0.968
	Xiniujiao	0.672	0.303	0.395	0.678	0.749	0.6	0.775	0.755
Diameter at breast height over bark (cm)	Shankou	0.588	0.452	0.875	0.881	0.944	0.903	0.962	0.956
	Tiantang	0.951	0.854	0.935	0.955	0.966	0.972	0.969	0.967
	Xiniujiao	0.62	0.25	0.341	0.663	0.722	0.605	0.801	0.773
Individual tree volume over bark (m3)	Shankou	0.673	0.564	0.891	0.942	0.939	0.889	0.939	0.922
	Tiantang	0.971	0.915	0.97	0.979	0.978	0.984	0.985	0.978
	Xiniujiao	0.396	0.288	0.2	0.637	0.732	0.589	0.626	0.628
